# Supplementary material for: The Prognostic Significance of Quantitative Myocardial Perfusion: An Artificial Intelligence–Based Approach Using Perfusion Mapping
Source: PubMed Central journal article supplement (PMC7176346; doi:10.1161/circulationaha.119.044666), 2020-02-14
Supplement: cir-141-1282-s001.pdf [file cir-141-1282-s001.pdf]

Supplemental Material

|                       | 1.5T<br>(n=679) | 3.0T<br>(n=370) | Significance<br>(p value) |
|-----------------------|-----------------|-----------------|---------------------------|
| Stress MBF (ml/g/min) | 2.07            | 2.06            | 0.807                     |
| MPR                   | 2.49            | 2.47            | 0.801                     |
| Death, n (%)          | 25 (3.7)        | 17 (4.6)        | 0.511                     |
| MACE, n (%)           | 116 (17.1)      | 58 (15.7)       | 0.603                     |

Supplemental Table 1. Comparison of perfusion data by field strength. Abbreviations: Myocardial blood flow (MBF), myocardial perfusion reserve (MPR), major adverse cardiovascular events (MACE), Tesla (T).

|                            | MACE | No MACE | Significance<br>(p value) |
|----------------------------|------|---------|---------------------------|
| Stress MBF 1.5T (ml/g/min) | 1.61 | 2.16    | <b>&lt;0.0001</b>         |
| MPR 1.5T                   | 1.94 | 2.60    | <b>&lt;0.0001</b>         |
| Stress MBF 3.0T (ml/g/min) | 1.64 | 2.13    | <b>&lt;0.0001</b>         |
| MPR 3.0T                   | 2.24 | 2.52    | <b>0.020</b>              |
| BHC MBF (ml/g/min)         | 1.58 | 2.11    | <b>&lt;0.0001</b>         |
| BHC MPR                    | 2.06 | 2.54    | <b>&lt;0.0001</b>         |
| RFH MBF (ml/g/min)         | 1.76 | 2.41    | <b>&lt;0.0001</b>         |
| RFH MPR                    | 1.97 | 2.72    | <b>&lt;0.0001</b>         |

Supplemental Table 2. Comparison of MACE events by field strength and scanning site.

Abbreviations: Myocardial blood flow (MBF), myocardial perfusion reserve (MPR), major adverse cardiovascular events (MACE), Tesla (T), Barts Heart Centre (BHC), Royal Free Hospital (RFH).
